# Supplementary material for: Profiling quality of care: Is there a role for peer review?
Source: Springer Nature journal article supplement (doi:10.1186/1472-6963-4-9), 2004-05-19
Supplement: Additional file 1 [file 1472-6963-4-9-s1.doc]

### Implicit Reviewer Recruitment and Selection

**1. Qualifications**

- need CV and two clinical references (and phone or pager, best way to reach that person), persons who can speak to their clinical expertise in general ambulatory care medicine
- review CVs for two years of clinical ambulatory care experience
- internal medicine, geriatrics, women’s health, family practice, etc. experience in recent past )not more than two years

**2. Training expectations**

- Training will take place late August or early September, probably over several weeks. Training will require some time on site, several 4-5 hour blocks, and some time doing review of materials at home. Details

**3. Reviews**

See “second mailing,” which follows

**Second Mailing**

We appreciate your interest in the medical record review project. Attached is further information.

If you are still interested, please provide the following to <>

- two clinical references (name, affiliation, telephone number) in general medicine

- CV (if you have not already provided it)

We will review this information over the next couple of weeks and be back in touch with you.

- BCBE fellows and attending physicians experienced and very comfortable with the many aspects of general medicine are invited to apply. Please provide two clinical references for general medicine and a CV.
- Training is expected to begin in late August or early September. Training will likely involve a few sessions on weekends. You will be reimbursed for training.
- All abstraction must be done on site at our research offices at Domino’s Farms.
- Each reviewer will complete about 50-100 reviews. Reviewers must be available throughout the duration of the study (approximately six months). The specific number of reviews and duration of the study will depend in part on the total number of reviewers on the project.
- A minimum commitment of 20 hours a month is required.
- Scheduling is flexible, including evenings and weekends, in about 3-6 hour time blocks.
- Scheduling will likely be done on a buddy system, so that at least two reviewers are working at each session.
- Compensation: Of the total compensation for training and reviews, 25% will be paid after all assigned reviews are completed.

Contact <>

References for physician reviewers: Applicant name: __________________________

Reference _______________________________ Affiliation/position: _____________________

1. How do you know the applicant? When did you work together with him/her?
2. Tell me about the applicant’s experience in general primary care medicine. How would you describe their clinical knowledge and judgment compared to others?
3. Does this person stays up to date on evidence-based medicine and trends in general medicine practice?
4. Work habits: Does he/she completes work? Are they responsible (e.g., attendance, follow up of problems)? Are they able to attend to details?
5. Then we will briefly explain the task we would like the person to do.
6. Do you think this applicant would be good at this task with appropriate training?
7. Is there anything else we should know about him/her?

Interview questions: References for physician reviewers

Applicant name: __________________________

Date of interview:

1. Explain task, determine interest and ability

Training required

On site review required

1. Can you give me a summary of your clinical experience in general medicine (how recent, types of patients cared for, awareness of the primary care tasks and patient needs, what were common conditions and situations that you had to address in clinical practice)
2. Quality review: Any experience?
3. How do you keep up to date on developments in medical care? (specifically probing for orientation toward evidence-based approaches and sources)
4. How much time do you think you can work on this every month? What hours/days would you have available (evenings, weekends, etc.) to come to the sites to work?
5. Discuss logistics: including; hours, “buddy system,” time commitment, direct contract for hourly rate, invoice monthly, pay at least one month after that, 25% withhold with final payment once all abstraction is completed.
6. Determine availability for training:
   Any weekends NOT available – vacation, family commitments
